# Supplementary material
Source: PubMed Central journal article supplement (PMC6414363)
Supplement: AEM.02684-18-s0001.pdf [file AEM.02684-18-s0001.pdf]

**Table S1.** Release of 3-MH and 4-MMP by 80 wine yeast strains in SGJ-thiol media.

| <sup>a</sup> Clade | <sup>b</sup> Origin and usage                     | AWRI number | 3-MH (ng L <sup>-1</sup> ) | 4-MMP (ng L <sup>-1</sup> ) | Genotype <i>IRC7</i>                       |
|--------------------|---------------------------------------------------|-------------|----------------------------|-----------------------------|--------------------------------------------|
| Wine               | Wine isolate, Australia 1947                      | 170         | 429                        | 253                         | <i>IRC7<sup>S</sup> / IRC7<sup>S</sup></i> |
| Wine               | Wine isolate, Australia 1949                      | 213         | 181                        | 217                         | <i>IRC7<sup>S</sup> / IRC7<sup>S</sup></i> |
| Wine               | Grape isolate, Australia 1949                     | 228         | 428                        | 347                         | <i>IRC7<sup>S</sup> / IRC7<sup>S</sup></i> |
| Wine               | Wine isolate, USA 1937                            | 266         | 571                        | 429                         | <i>IRC7<sup>S</sup> / IRC7<sup>S</sup></i> |
| ?                  | <b>AWRI350 (Maurivin)<sup>Both</sup></b>          | 350         | 260                        | 202                         | <i>IRC7<sup>S</sup> / IRC7<sup>S</sup></i> |
| Other              | Cider and wine yeast, Switzerland                 | 735         | 189                        | 150                         | <i>IRC7<sup>S</sup> / IRC7<sup>S</sup></i> |
| Wine               | Isolate of AWRI792                                | 793         | 340                        | 403                         | <i>IRC7<sup>S</sup> / IRC7<sup>S</sup></i> |
| Wine               | <b>AWRI796 (Maurivin)<sup>Both</sup></b>          | 796         | 713                        | 266                         | <i>IRC7<sup>S</sup> / IRC7<sup>S</sup></i> |
| Wine               | Wine isolate, Penfolds B, Australia 1979          | 833         | 407                        | 242                         | <i>IRC7<sup>S</sup> / IRC7<sup>S</sup></i> |
| Wine               | <b>Lalvin ICV D254 (Lallemand)<sup>Both</sup></b> | 1483        | 357                        | 260                         | <i>IRC7<sup>S</sup> / IRC7<sup>S</sup></i> |
| Wine               | <b>Lalvin ICV D47 (Lallemand)<sup>Both</sup></b>  | 1488        | 431                        | 189                         | <i>IRC7<sup>S</sup> / IRC7<sup>S</sup></i> |
| Wine               | <b>Uvaferm BDX (Lallemand)<sup>Red</sup></b>      | 1491        | 408                        | 238                         | <i>IRC7<sup>S</sup> / IRC7<sup>S</sup></i> |
| Wine               | <b>Lalvin T73 (Lallemand)<sup>Red</sup></b>       | 1497        | 640                        | 388                         | <i>IRC7<sup>S</sup> / IRC7<sup>S</sup></i> |
| Wine               | Wolf                                              | 1709        | 605                        | 414                         | <i>IRC7<sup>S</sup> / IRC7<sup>S</sup></i> |
| Wine               | Australia; wine                                   | 1712        | 498                        | 334                         | <i>IRC7<sup>S</sup> / IRC7<sup>S</sup></i> |
| Wine               | Australia, pre1980                                | 1716        | 424                        | 245                         | <i>IRC7<sup>S</sup> / IRC7<sup>S</sup></i> |
| Wine               |                                                   | 1778        | 462                        | 328                         | <i>IRC7<sup>S</sup> / IRC7<sup>S</sup></i> |
| Wine               | France                                            | 1781        | 419                        | 265                         | <i>IRC7<sup>S</sup> / IRC7<sup>S</sup></i> |
| Wine               | <b>Uvaferm 43 (Lallemand)<sup>Restart</sup></b>   | 1833        | 502                        | 294                         | <i>IRC7<sup>S</sup> / IRC7<sup>S</sup></i> |

| <sup>a</sup> Clade | <sup>b</sup> Origin and usage                            | AWRI number | 3-MH (ng L <sup>-1</sup> ) | 4-MMP (ng L <sup>-1</sup> ) | Genotype <i>IRC7</i>                                              |
|--------------------|----------------------------------------------------------|-------------|----------------------------|-----------------------------|-------------------------------------------------------------------|
| Wine               | <b>Lalvin ICV D21 (Lallemand)<sup>Both</sup></b>         | 2077        | 527                        | 421                         | <i>IRC7<sup>S</sup></i> / <i>IRC7<sup>S</sup></i>                 |
| Wine               | <b>Lalvin CY3079 (Lallemand)<sup>White</sup></b>         | 2078        | 439                        | 171                         | <i>IRC7<sup>S</sup></i> / <i>IRC7<sup>S</sup></i>                 |
| Wine               | <b>Enoferm T306 (Lallemand)<sup>Both</sup></b>           | 2079        | 480                        | 259                         | <i>IRC7<sup>S</sup></i> / <i>IRC7<sup>S</sup></i>                 |
| Wine               | <b>Uvaferm HPS (Lallemand)<sup>Red</sup></b>             | 2255        | 284                        | 350                         | <i>IRC7<sup>S</sup></i> / <i>IRC7<sup>S</sup></i>                 |
| PDM                | <b>NT116 (Anchor Yeast)<sup>Both</sup></b>               | 2776        | 580                        | 242                         | <i>IRC7<sup>S</sup></i> / <i>IRC7<sup>S</sup></i>                 |
| Wine               | <b>Actiflore Rose (Laffort)<sup>Rose</sup></b>           | 2851        | 584                        | 503                         | <i>IRC7<sup>S</sup></i> / <i>IRC7<sup>S</sup></i>                 |
| Wine               | <b>Fermicru VR5 (Oenobrand)<sup>Red</sup></b>            | 2874        | 381                        | 355                         | <i>IRC7<sup>S</sup></i> / <i>IRC7<sup>S</sup></i>                 |
| Wine               | <b>Lalvin Rhone 2323 (Lallemand)<sup>Red</sup></b>       | 1490        | 495                        | 249                         | <i>IRC7<sup>S</sup></i> / <i>IRC7<sup>S</sup></i> Y56stop         |
| Wine               | Wine isolate, Australia, 1988                            | 1686        | 507                        | 405                         | <i>IRC7<sup>S</sup></i> / <i>IRC7<sup>S</sup></i> Y56stop         |
| Wine               | Wine isolate, Australia                                  | 1742        | 391                        | 394                         | <i>IRC7<sup>S</sup></i> / <i>IRC7<sup>S</sup></i> Y56stop         |
| Wine               | Wine isolate, France                                     | 1756        | 571                        | 445                         | <i>IRC7<sup>S</sup></i> / <i>IRC7<sup>S</sup></i> Y56stop         |
| Wine               | Wine isolate, France                                     | 1759        | 1067                       | 351                         | <i>IRC7<sup>S</sup></i> / <i>IRC7<sup>S</sup></i> Y56stop         |
| Wine               | Wine isolate, Canada 1961; Tokay                         | 724         | 460                        | 283                         | <i>IRC7<sup>S</sup></i> Y56stop / <i>IRC7<sup>S</sup></i> Y56stop |
| Wine               | <b>Lalvin RC212 (Lallemand)<sup>Red</sup></b>            | 1485        | 612                        | 350                         | <i>IRC7<sup>S</sup></i> Y56stop / <i>IRC7<sup>S</sup></i> Y56stop |
| Wine               | <b>Lalvin BM45 (Lallemand)<sup>Both</sup></b>            | 1486        | 582                        | 321                         | <i>IRC7<sup>S</sup></i> Y56stop / <i>IRC7<sup>S</sup></i> Y56stop |
| Wine               | Wine isolate, Australia                                  | 1736        | 463                        | 391                         | <i>IRC7<sup>S</sup></i> Y56stop / <i>IRC7<sup>S</sup></i> Y56stop |
| Wine               | Wine isolate, France                                     | 1757        | 563                        | 404                         | <i>IRC7<sup>S</sup></i> D139N/ <i>IRC7<sup>S</sup></i> Y56stop    |
| Wine               | Wine isolate                                             | 1787        | 751                        | 357                         | <i>IRC7<sup>S</sup></i> D139N/ <i>IRC7<sup>S</sup></i> Y56stop    |
| Other              | <b>Collection Cepage Pinot (Oenobrand)<sup>Red</sup></b> | 2865        | 131                        | 201                         | <i>IRC7<sup>S</sup></i> G304D / <i>IRC7<sup>S</sup></i> Y56stop   |
| Wine               | Wine isolate, Blastocel Grand Cru                        | 2013        | 534                        | 405                         | <i>IRC7<sup>S</sup></i> / <i>IRC7<sup>S</sup></i> P146A           |

| <sup>a</sup> Clade | <sup>b</sup> Origin and usage                                   | AWRI number | 3-MH (ng L <sup>-1</sup> ) | 4-MMP (ng L <sup>-1</sup> ) | Genotype <i>IRC7</i>                                    |
|--------------------|-----------------------------------------------------------------|-------------|----------------------------|-----------------------------|---------------------------------------------------------|
| Wine               | <b>Zymaflore F15 (Laffort)<sup>Red</sup></b>                    | 2852        | 722                        | 448                         | IRC7 <sup>S</sup> P146A / IRC7 <sup>S</sup> P146A       |
| Wine               | <b>Collection Cepage Syrah (Oenobrand)<sup>Red</sup></b>        | 2867        | 771                        | 383                         | IRC7 <sup>S</sup> P146A / IRC7 <sup>S</sup> P146A       |
| Wine               |                                                                 | 896         | 538                        | 373                         | IRC7 <sup>S</sup> D139N / IRC7 <sup>S</sup> D139N       |
| Wine               | <b>Collection Cepage Chardonnay (Oenobrand)<sup>White</sup></b> | 2863        | 562                        | 407                         | IRC7 <sup>S</sup> D139N / IRC7 <sup>S</sup> D139N       |
| Wine               | Australia                                                       | 1017        | 1364                       | 3455                        | IRC7 <sup>S</sup> / IRC7 <sup>L</sup>                   |
| Wine               | <b>Vin13 (Anchor Yeast)<sup>White</sup></b>                     | 1537        | 1005                       | 2157                        | IRC7 <sup>S</sup> / IRC7 <sup>L</sup>                   |
| PDM                | <b>NT112 (Anchor Yeast)<sup>Red</sup></b>                       | 2878        | 747                        | 1904                        | IRC7 <sup>S</sup> / IRC7 <sup>L</sup>                   |
| Wine               | Australia 2004; wine                                            | 1482        | 1062                       | 1432                        | IRC7 <sup>S</sup> Y56stop/ IRC7 <sup>L</sup>            |
| Wine               | <b>Lalvin Rhone 2056 (Lallemand)<sup>Both</sup></b>             | 1487        | 1190                       | 3579                        | IRC7 <sup>S</sup> Y56stop/ IRC7 <sup>L</sup>            |
| PDM                | Lalvin EC-1118 (Lallemand) <sup>Both</sup>                      | 838         | 508                        | 504                         | IRC7 <sup>S</sup> / IRC7 <sup>L</sup> T185A             |
| PDM                | Avise sparkling wine yeast, Petaluma                            | 1001        | 658                        | 690                         | IRC7 <sup>S</sup> / IRC7 <sup>L</sup> T185A             |
| PDM                | <b>Lalvin DV10 (Lallemand)<sup>Both</sup></b>                   | 1429        | 590                        | 550                         | IRC7 <sup>S</sup> / IRC7 <sup>L</sup> T185A             |
| PDM                | <b>Platinum (Maurivin)<sup>Both</sup></b>                       | 1638        | 1290                       | 928                         | IRC7 <sup>S</sup> / IRC7 <sup>L</sup> T185A             |
| PDM                |                                                                 | 1795        | 514                        | 546                         | IRC7 <sup>S</sup> / IRC7 <sup>L</sup> T185A             |
| PDM                | <b>Lalvin QA23 (Lallemand)<sup>White</sup></b>                  | 2260        | 463                        | 526                         | IRC7 <sup>S</sup> / IRC7 <sup>L</sup> T185A             |
| Wine               | <b>Zymaflore VL1 (Laffort)<sup>White</sup></b>                  | 2858        | 1155                       | 1305                        | IRC7 <sup>S</sup> / IRC7 <sup>L</sup> T185A             |
| PDM                | <b>Vin2000 (Anchor Yeast)<sup>White</sup></b>                   | 2881        | 412                        | 613                         | IRC7 <sup>S</sup> / IRC7 <sup>L</sup> T185A             |
| PDM                | <b>Maurivin Elegance (Maurivin)<sup>White</sup></b>             | 2910        | 413                        | 493                         | IRC7 <sup>S</sup> / IRC7 <sup>L</sup> T185A             |
| Wine               |                                                                 | 947         | 409                        | 238                         | IRC7 <sup>S</sup> P146A / IRC7 <sup>L</sup> T185A P146R |
| Wine               | <b>Zymaflore X16 (Laffort)<sup>White</sup></b>                  | 2860        | 923                        | 1031                        | IRC7 <sup>S</sup> P146A / IRC7 <sup>L</sup> T185A       |

| <sup>a</sup> Clade | <sup>b</sup> Origin and usage                             | AWRI number | 3-MH (ng L <sup>-1</sup> ) | 4-MMP (ng L <sup>-1</sup> ) | Genotype <i>IRC7</i>                                                        |
|--------------------|-----------------------------------------------------------|-------------|----------------------------|-----------------------------|-----------------------------------------------------------------------------|
| Other              | CBS 7045 wine                                             | 1722        | 247                        | 938                         | IRC7 <sup>S</sup> Y56stop A356V / IRC7 <sup>L</sup> T185A G77S              |
| Wine               | France                                                    | 1758        | 635                        | 696                         | IRC7 <sup>S</sup> Y56stop/ IRC7 <sup>L</sup> T185A K379E                    |
| Vin7               | Germany; pre1968                                          | 740         | 679                        | 273                         | IRC7 <sup>S</sup> / IRC7 <sup>L</sup> T185A P146R G321D                     |
| Wine               | GF7                                                       | 1776        | 840                        | 275                         | IRC7 <sup>S</sup> T185A / IRC7 <sup>L</sup> T185A P146R                     |
| Other              | UCD 48-41                                                 | 934         | 2508                       | 5298                        | IRC7 <sup>L</sup> / IRC7 <sup>L</sup>                                       |
| Wine               | <b>Maurivin UOA Maxithiol (Maurivin)</b> <sup>White</sup> | 2914        | 2481                       | 4690                        | IRC7 <sup>L</sup> / IRC7 <sup>L</sup>                                       |
| Other              | NCYC 761 (Palm wine)                                      | 1082        | 2226                       | 4876                        | IRC7 <sup>L</sup> E374G / IRC7 <sup>L</sup> E374G                           |
| ?                  | PW5 (Palm tree)                                           | 2829        | 2004                       | 5215                        | IRC7 <sup>L</sup> E374G / IRC7 <sup>L</sup> E374G                           |
| Other              |                                                           | 1729        | 1569                       | 3014                        | IRC7 <sup>L</sup> / IRC7 <sup>L</sup> D47N                                  |
| Wine               | <b>Zymaflore VL3c (Laffort)</b> <sup>White</sup>          | 1688        | 1183                       | 1869                        | IRC7 <sup>L</sup> T185A / IRC7 <sup>L</sup> T185A                           |
| Wine               | <b>Maurivin Sauvignon (Maurivin)</b> <sup>White</sup>     | 2913        | 1125                       | 2141                        | IRC7 <sup>L</sup> T185A / IRC7 <sup>L</sup> T185A                           |
| Other              | England, pre1967; apple skin                              | 739         | 183                        | 489                         | IRC7 <sup>L</sup> T185A K43R / IRC7 <sup>L</sup> T185A K43R                 |
| Wine               | <b>Lalvin 71B (Lallemand)</b> <sup>Both</sup>             | 149         | 170                        | 308                         | IRC7 <sup>L</sup> T185A K43R / IRC7 <sup>L</sup> T185A K43R                 |
| Vin7               | Australia 1940; sherry                                    | 81          | 295                        | 278                         | IRC7 <sup>L</sup> T185A M106I W274R / IRC7 <sup>L</sup> T185A M106I / W274R |
| Vin7               | Australia                                                 | 722         | 634                        | 223                         | IRC7 <sup>L</sup> T185A P146R / IRC7 <sup>L</sup> T185A P146R               |
| Vin7               | Australia 1971; wine                                      | 763         | 1061                       | 263                         | IRC7 <sup>L</sup> T185A P146R / IRC7 <sup>L</sup> T185A G321D               |
| Vin7               | <b>Fermichamp (Oenobrand)</b> <sup>Restart</sup>          | 1899        | 544                        | 316                         | IRC7 <sup>L</sup> T185A / IRC7 <sup>L</sup> T185A G253R                     |
| Vin7               | Australia 1973; wine                                      | 778         | 1537                       | 390                         | IRC7 <sup>L</sup> T185A / IRC7 <sup>L</sup> T185A G321D                     |
| PDM                | <b>NT50 (Anchor Yeast)</b> <sup>Red</sup>                 | 2880        | 839                        | 871                         | IRC7 <sup>L</sup> T185A / IRC7 <sup>L</sup> T185A E323G                     |
| Wine               | <b>Zymaflore X5 (Laffort)</b> <sup>White</sup>            | 2861        | 1643                       | 2618                        | IRC7 <sup>L</sup> / IRC7 <sup>S</sup> T185A P146A                           |
| Other              | NCYC 738, England 1972; brewery                           | 1910        | 1009                       | 1601                        | IRC7 <sup>L</sup> / IRC7 <sup>S</sup> T185A A356V                           |

<sup>a</sup>Clade as described by Borneman et al. (2016). <sup>b</sup>Commercial strains in bold-face type. Recommended usage of strains by manufacturers (white = white winemaking, red = red winemaking, both = red and white winemaking, Rosé = Rosé winemaking, Restart = stuck or sluggish fermentations).

**Table S2.** Release of 3-MH and 4-MMP by wine yeast strains in SGJ-thiol media according to their clade (as described in Borneman et al., 2016).

| Clade | no.      | 3-MH (ng L <sup>-1</sup> ) | 4-MMP (ng L <sup>-1</sup> ) | <sup>a</sup> <i>IRC7</i> genotype |
|-------|----------|----------------------------|-----------------------------|-----------------------------------|
| Wine  | 53 (68%) | 666 ± 397 <sup>a</sup>     | 735 ± 960 <sup>b</sup>      | 74% s/s, 17% s/l / 9% l/l         |
| PDM   | 11 (14%) | 637 ± 254 <sup>a</sup>     | 715 ± 436 <sup>b</sup>      | 9% s/s, 82% s/l / 9% l/l          |
| Vin7  | 6 (8%)   | 791 ± 441 <sup>a</sup>     | 290 ± 57 <sup>b</sup>       | 0% s/s, 16% s/l / 84% l/l         |
| Other | 8 (10%)  | 1008 ± 982 <sup>a</sup>    | 2071 ± 2083 <sup>a</sup>    | 25% s/s, 12% s/l / 63% l/l        |

Means with the same superscript letter are not significantly different from each other

(Tukey's test,  $P < 0.05$ ). <sup>a</sup>*IRC7* genotype: s/s refers to the homozygous short allele (*IRC7<sup>S</sup>* / *IRC7<sup>S</sup>*), l/l to the homozygous long or full-length allele (*IRC7<sup>L</sup>* / *IRC7<sup>L</sup>*), while s/l refers to heterozygous strains (*IRC7<sup>S</sup>* / *IRC7<sup>L</sup>*).

## References

Borneman AR, Forgan AH, Kolouchova R, Fraser JA, Schmidt SA. 2016. Whole Genome Comparison Reveals High Levels of Inbreeding and Strain Redundancy Across the Spectrum of Commercial Wine Strains of *Saccharomyces cerevisiae*. *G3 (Bethesda)* 6:957-71.
